# Supplementary material for: Gene expression regulation by the Chromodomain helicase DNA-binding protein 9 (CHD9) chromatin remodeler is dispensable for murine development
Source: PubMed Central journal article supplement (PMC7250415; doi:10.1371/journal.pone.0233394), 2020-05-26

### A. Thymus

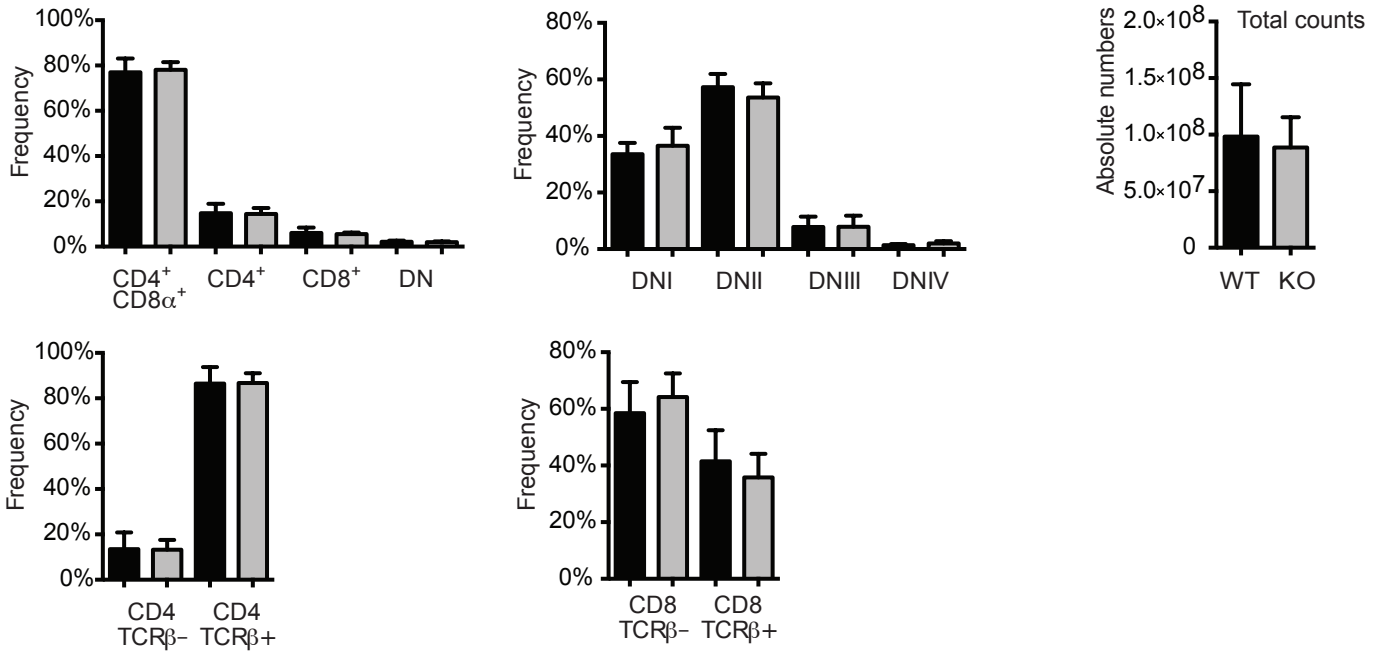

### B. Spleen

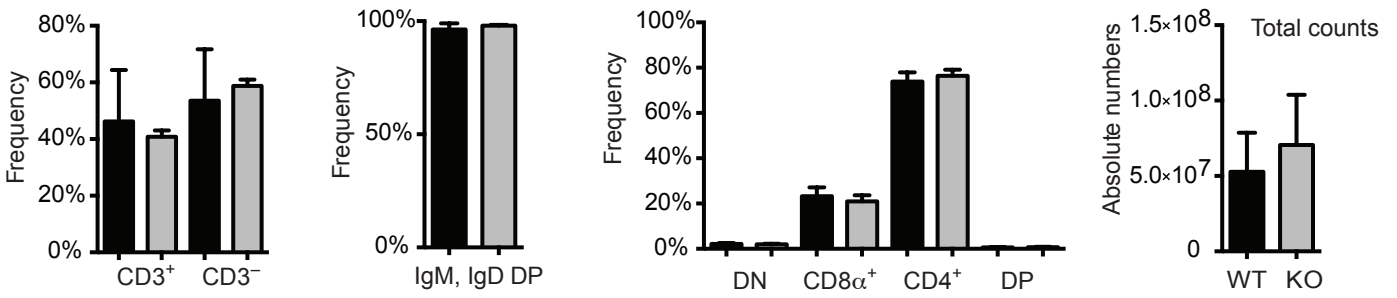

### C. Blood

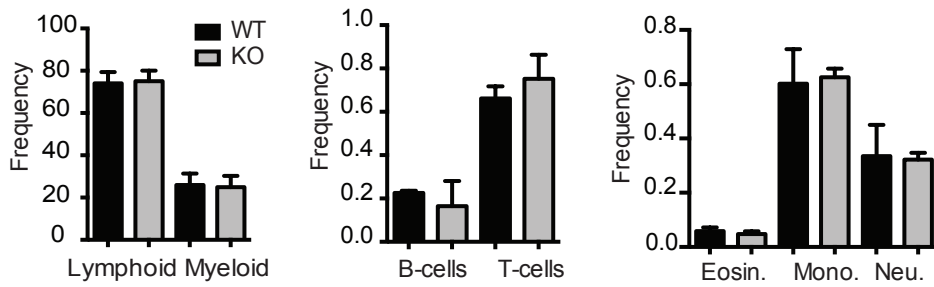

Supplement: pone.0233394.s006.pdf [file pone.0233394.s006.pdf]
