# Supplementary material for: Gene expression regulation by the Chromodomain helicase DNA-binding protein 9 (CHD9) chromatin remodeler is dispensable for murine development
Source: PubMed Central journal article supplement (PMC7250415; doi:10.1371/journal.pone.0233394), 2020-05-26

A.

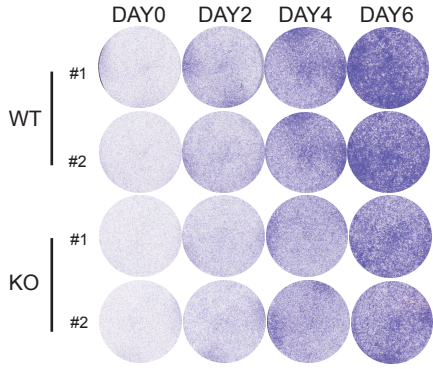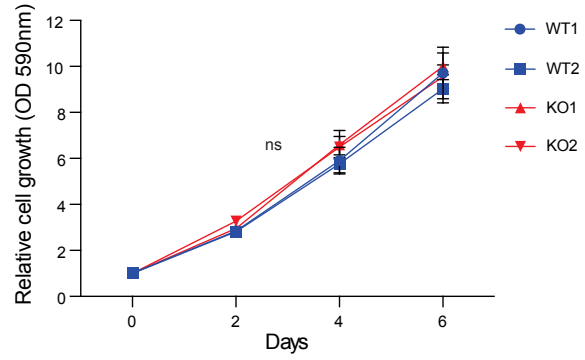

B.

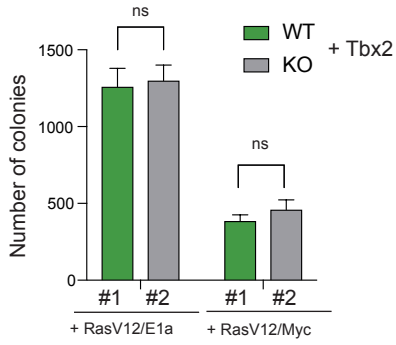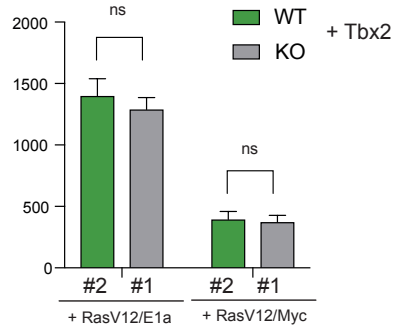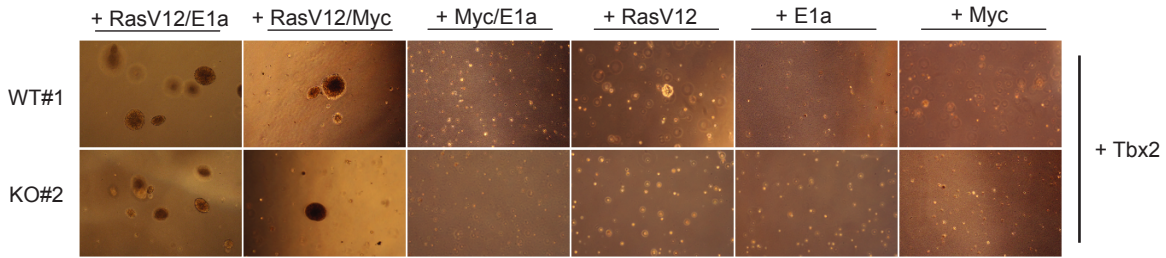

Supplement: pone.0233394.s009.pdf [file pone.0233394.s009.pdf]
