# Supplementary material for: Gene expression regulation by the Chromodomain helicase DNA-binding protein 9 (CHD9) chromatin remodeler is dispensable for murine development
Source: PubMed Central journal article supplement (PMC7250415; doi:10.1371/journal.pone.0233394), 2020-05-26

### mRNA expression (Affy): CHD9

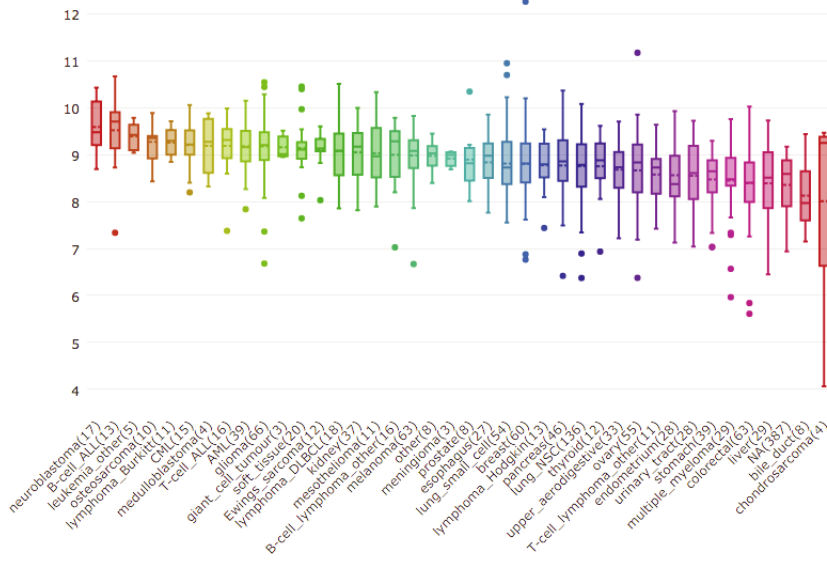

### mRNA expression (RNAseq): CHD9

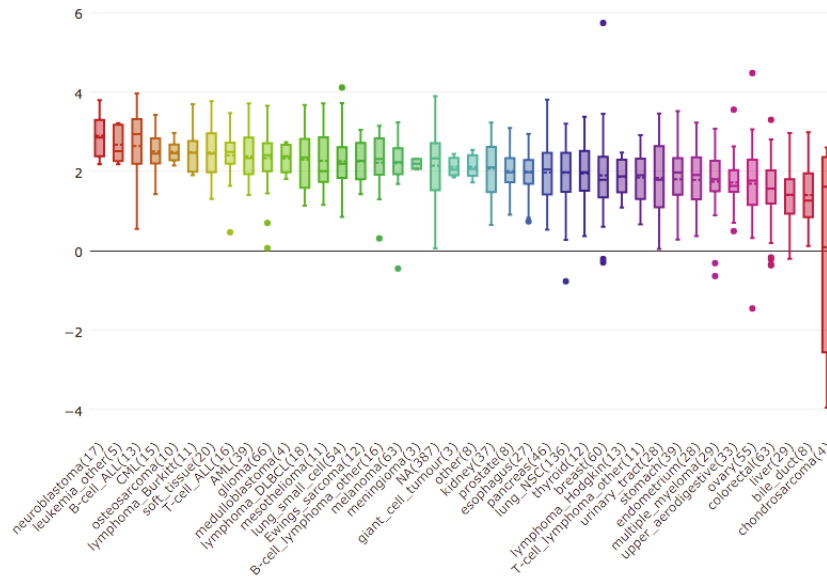

Supplement: pone.0233394.s010.pdf [file pone.0233394.s010.pdf]
