# Supplementary material for: Gene expression regulation by the Chromodomain helicase DNA-binding protein 9 (CHD9) chromatin remodeler is dispensable for murine development
Source: PubMed Central journal article supplement (PMC7250415; doi:10.1371/journal.pone.0233394), 2020-05-26
Supplement: pone.0233394.s011.pdf [file pone.0233394.s011.pdf]

A.

K562

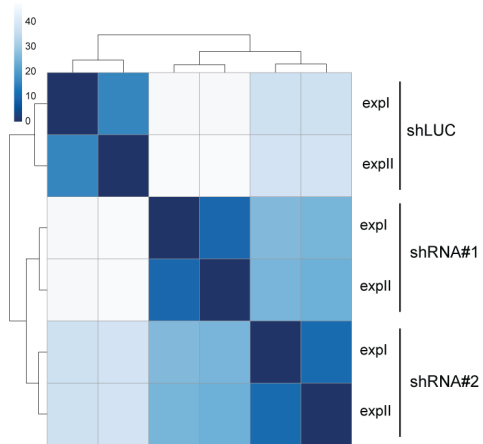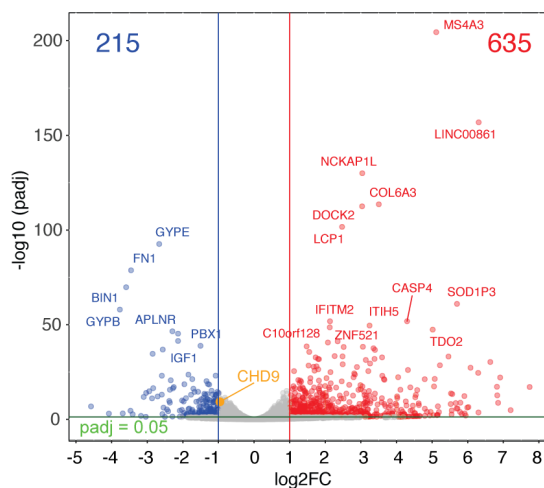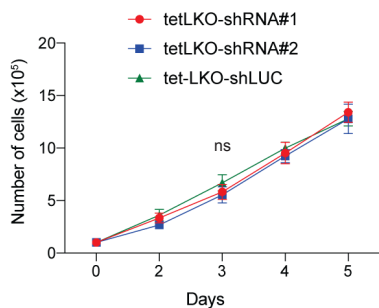

tet-LKO  
shRNA  
infected cells

+DOX  
2 days

100,000 cells  
seeded in a 6-well plate  
for proliferation assay  
( $t=0$ )

B.

SNB19

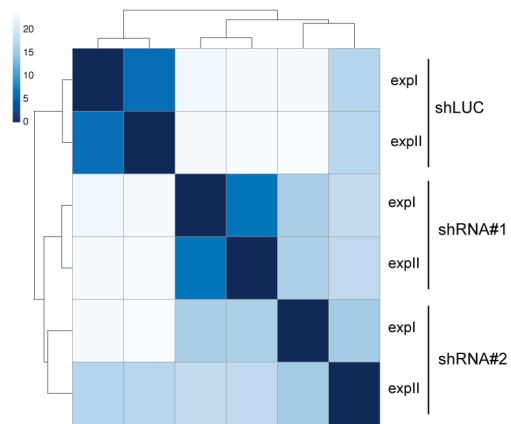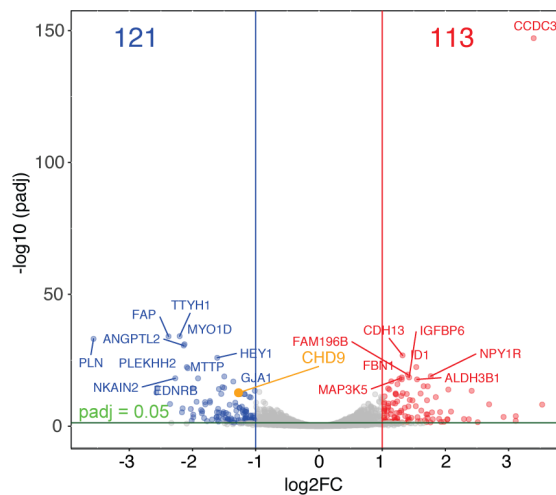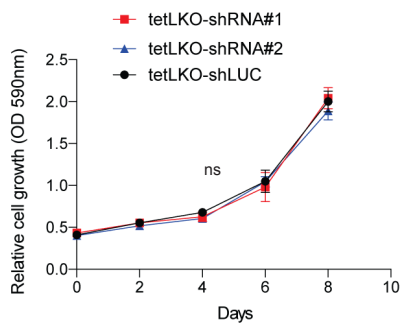

tet-LKO  
shRNA  
infected cells

+DOX  
2 days

25,000 cells  
seeded in a 6-well plate  
for proliferation assay  
( $t=0$ )
