# Supplementary material for: Gene expression regulation by the Chromodomain helicase DNA-binding protein 9 (CHD9) chromatin remodeler is dispensable for murine development
Source: PubMed Central journal article supplement (PMC7250415; doi:10.1371/journal.pone.0233394), 2020-05-26

### ESC (KEGG Negative)

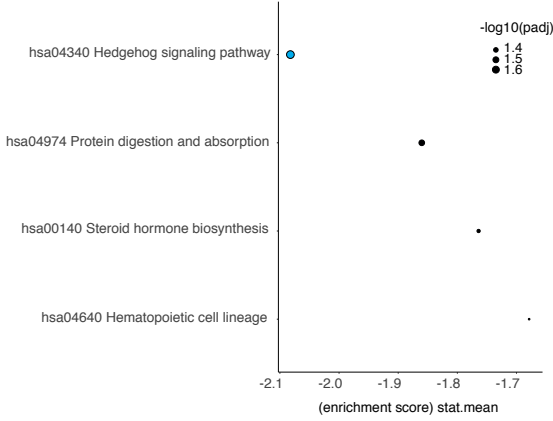

### BRAIN (KEGG Negative)

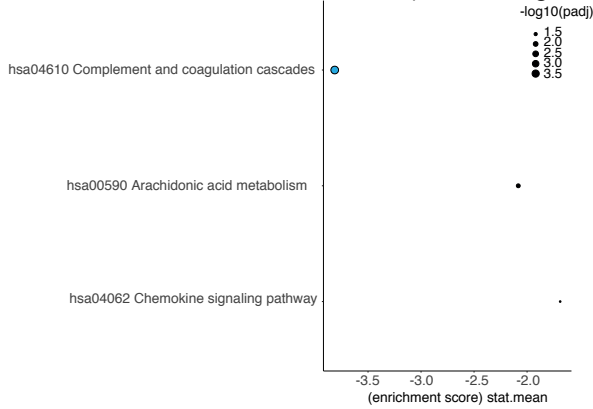

### LIVER (KEGG Positive)

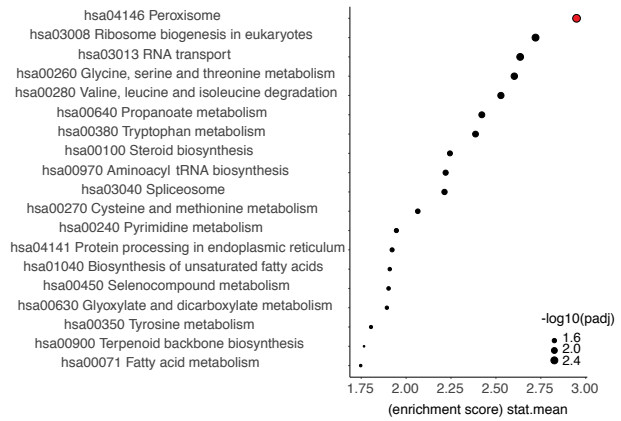

### K562 (KEGG Negative)

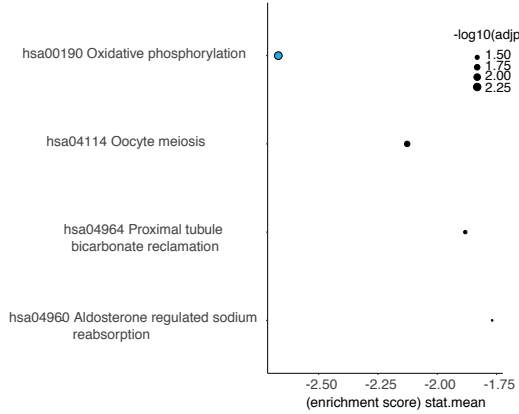

### SNB19 (KEGG Negative)

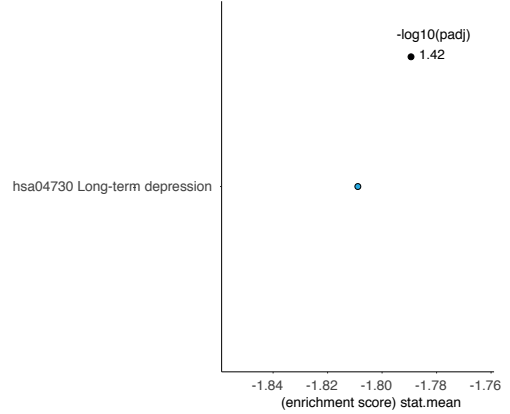

### EμMyc;Chd9<sup>-/-</sup> (KEGG Negative)

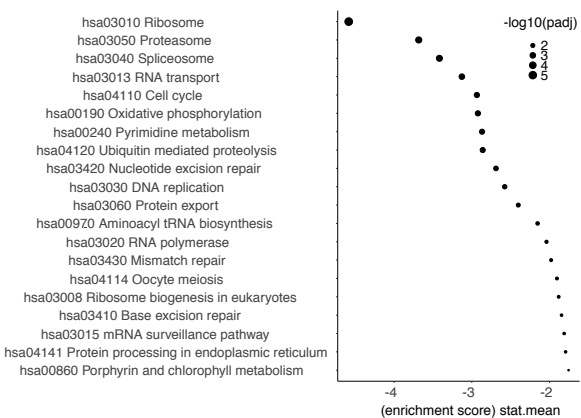

### EμMyc;Chd9<sup>-/-</sup> (KEGG Negative)

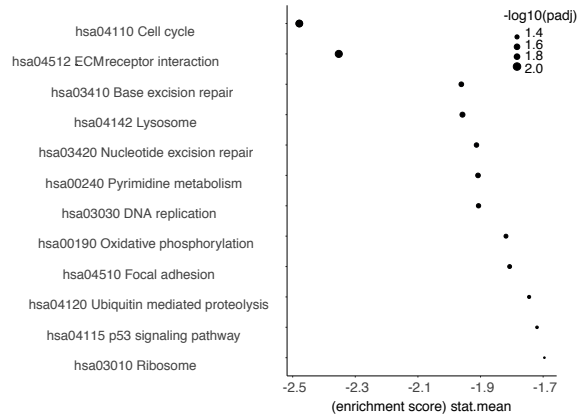

Supplement: pone.0233394.s012.pdf [file pone.0233394.s012.pdf]
