# Supplementary material for: Gene expression regulation by the Chromodomain helicase DNA-binding protein 9 (CHD9) chromatin remodeler is dispensable for murine development
Source: PubMed Central journal article supplement (PMC7250415; doi:10.1371/journal.pone.0233394), 2020-05-26
Supplement: pone.0233394.s013.pdf [file pone.0233394.s013.pdf]

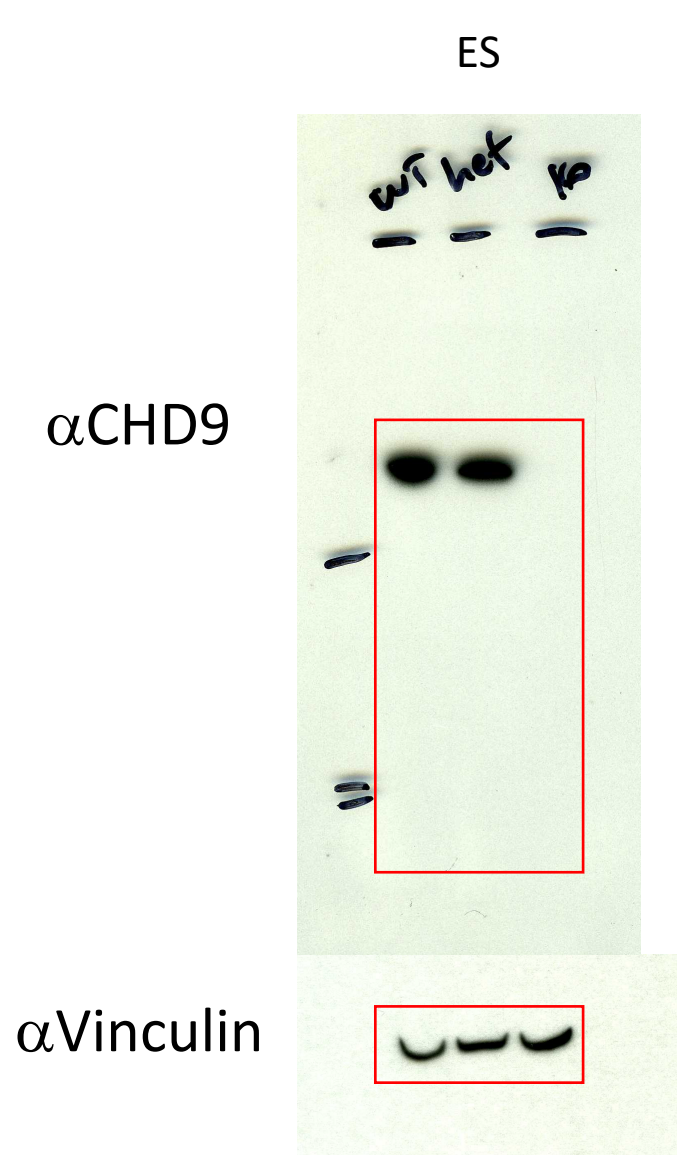

Fig 1C

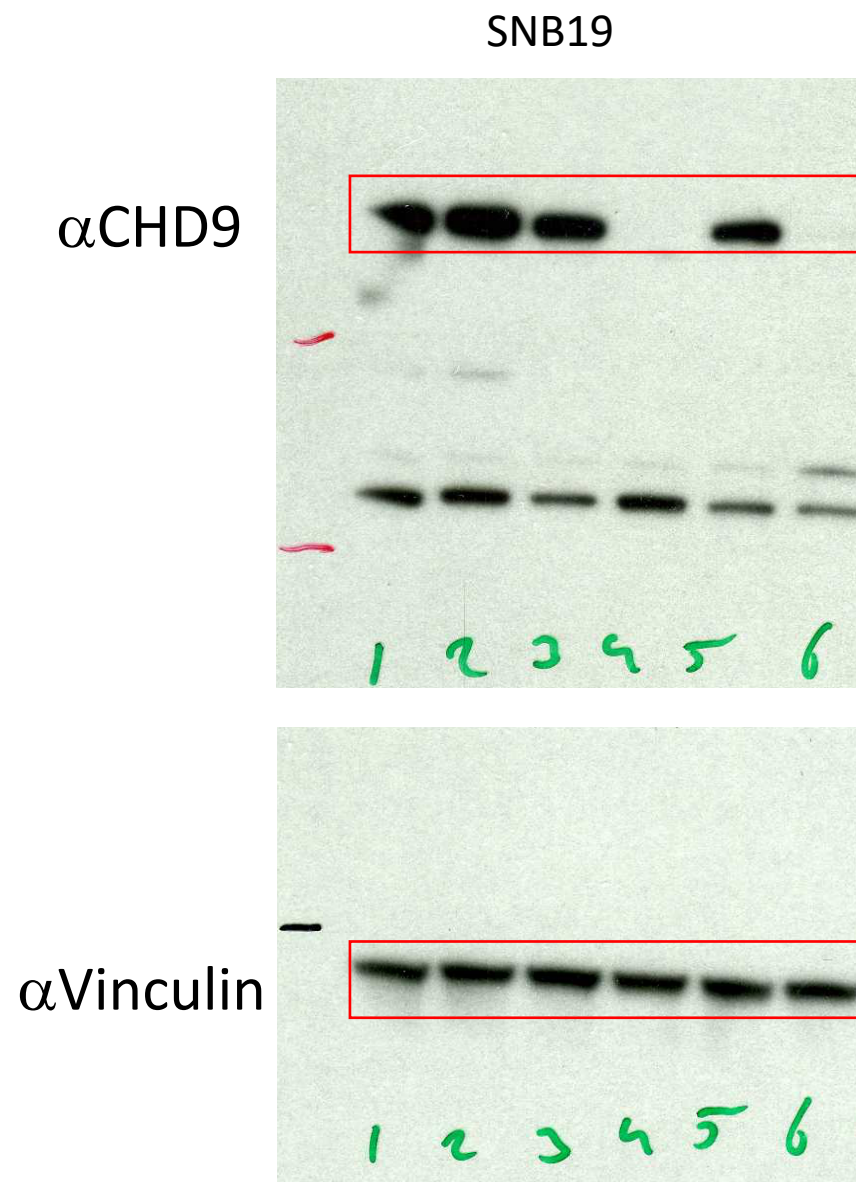

Fig 5A

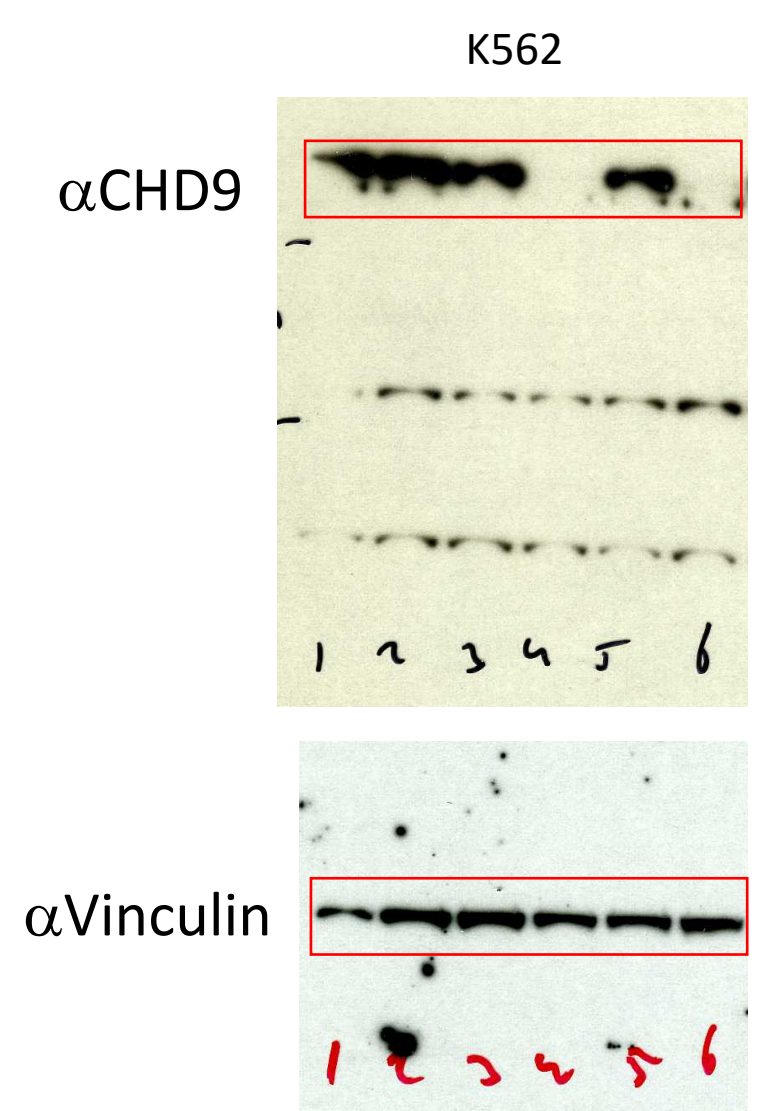

Fig 5B

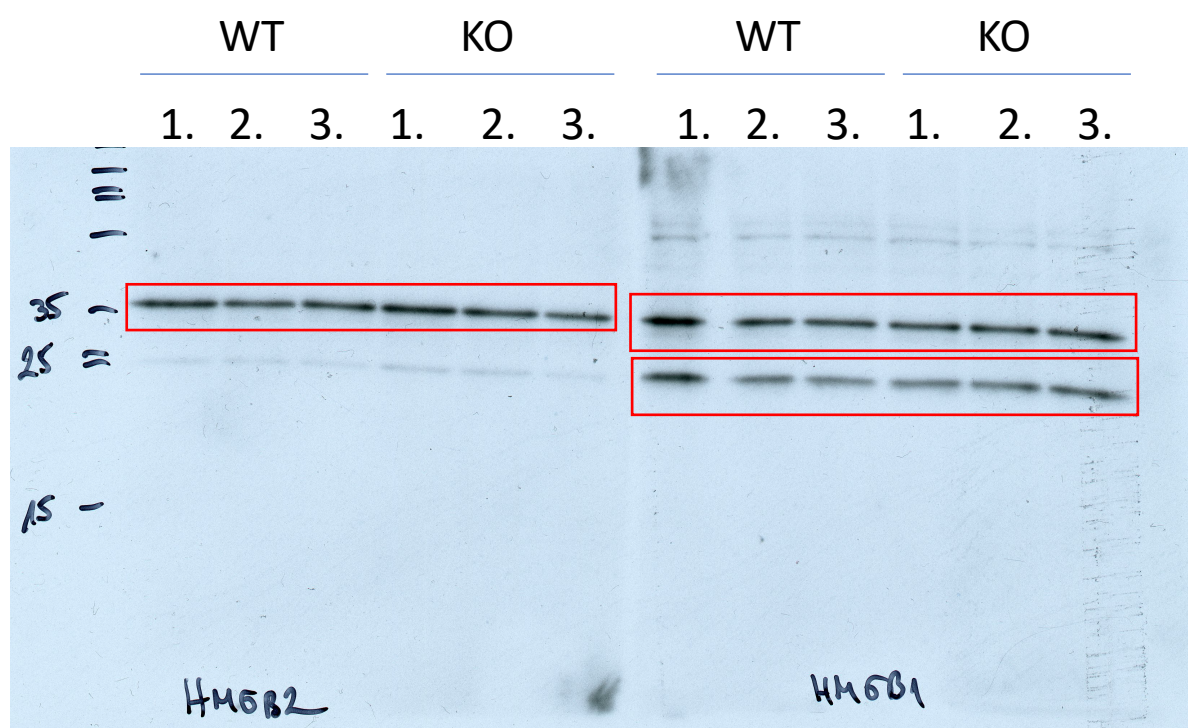

←  $\alpha$ GAPDH (35kDa)

←  $\alpha$ HMGB1 (25kDa)

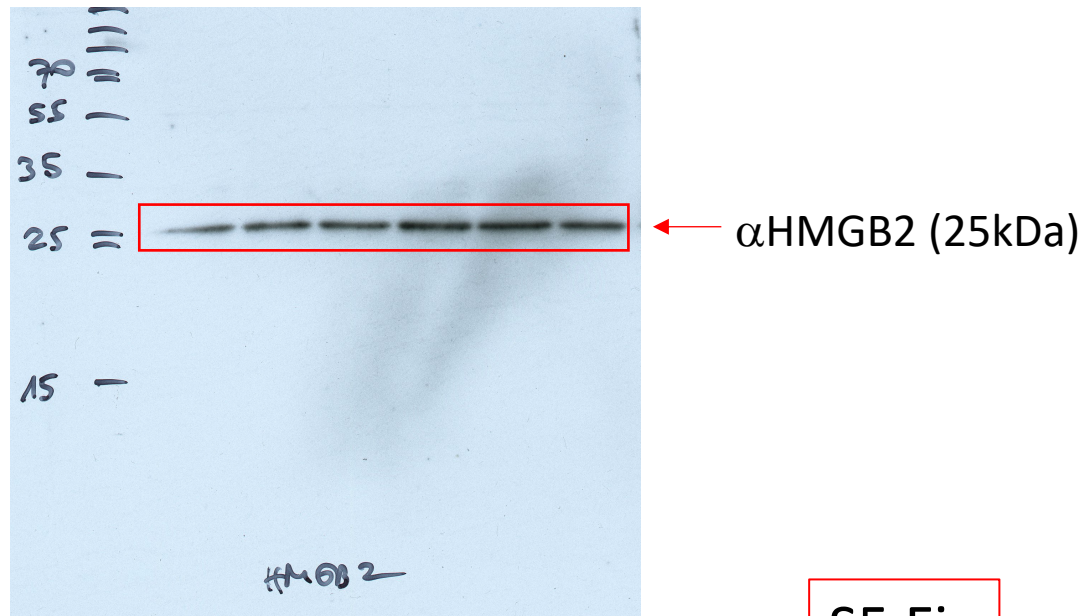

S5 Fig
